# Supplementary material
Source: Springer Nature journal article supplement (https://www.springermedizin.de/resource/supplementary/12936_2008_722_MOESM4_ESM.pdf/9548088)

**Monoxygenase activity**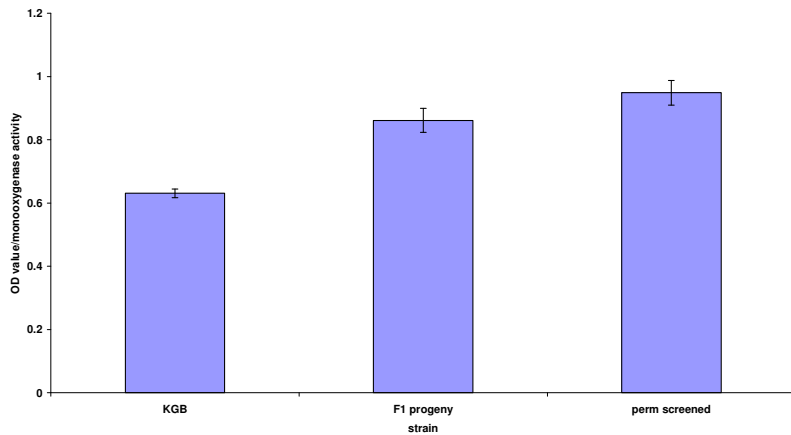**GST activity**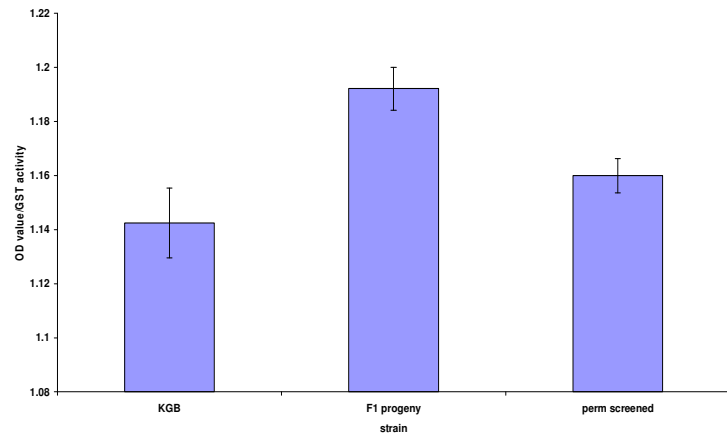**alpha esterases activity**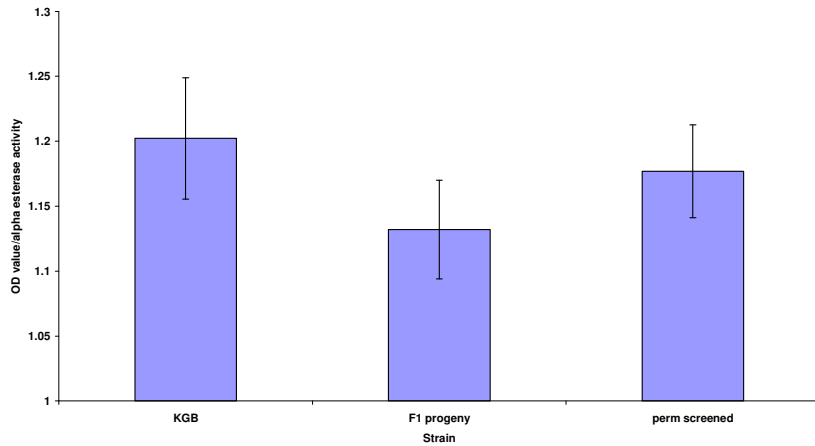**Beta esterase activity**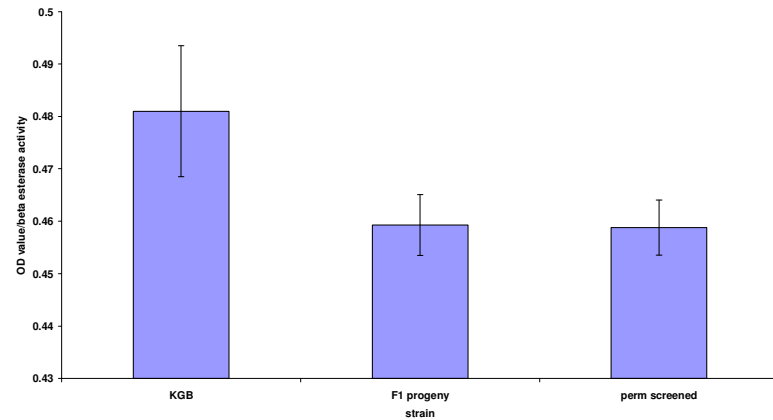

Supplement: MOESM4 [file 9548088]
